# Supplementary material for: Investigation on enhanced photocatalytic degradation of bisphenol A with bismuth oxyiodide catalyst using response surface methodology
Source: Royal Society of Chemistry journal article supplement (doi:10.1039/c7ra13460f), 2018-01-01
Supplement: c7ra13460f1.pdf [file c7ra13460f1.pdf]

## **Electronic Supplementary Information**

### **Investigation on enhanced photocatalytic degradation of bisphenol A with bismuth oxyiodide catalyst using response surface methodology**

Dan Zhang, Fei Wang\*, Suzhen Cao, Xiaoli Duan\*

School of Energy and Environmental Engineering, University of Science and  
Technology Beijing, Xueyuan Road No.30, Haidian District, Beijing 100083, PR  
China

\* Corresponding authors.

E-mail addresses: wangfei@ustb.edu.cn (F. Wang), jasmine@ustb.edu.cn (X. Duan)

Number of Tables: 2

Number of Figures: 7

**Table S1** Experimental range and levels for Box-Behnken design (BBD).

| Factors<br>code | Independent variable                   | Range and levels |             |           |
|-----------------|----------------------------------------|------------------|-------------|-----------|
|                 |                                        | Low (-1)         | Central (0) | High (+1) |
| A               | Catalyst dosage (g/L)                  | 0.1              | 1.05        | 2.0       |
| B               | Initial concentration<br>of BPA (mg/L) | 10               | 30          | 50        |
| C               | pH value                               | 3                | 6.5         | 10        |

**Table S2** Adequacy summary of the models tested for BBD experimental data.

| Source    | Sequential<br>p-value | Lack of fit<br>p-value | Adjusted<br>R-squared | Predicted<br>R-squared | Remark    |
|-----------|-----------------------|------------------------|-----------------------|------------------------|-----------|
| Linear    | 0.0001                | 0.0368                 | 0.7865                | 0.6436                 |           |
| 2FI       | 0.6357                | 0.0301                 | 0.7600                | 0.2815                 |           |
| Quadratic | 0.0013                | 0.2700                 | 0.9794                | 0.9016                 | Suggested |
| Cubic     | 0.2700                |                        | 0.9903                |                        | Aliased   |

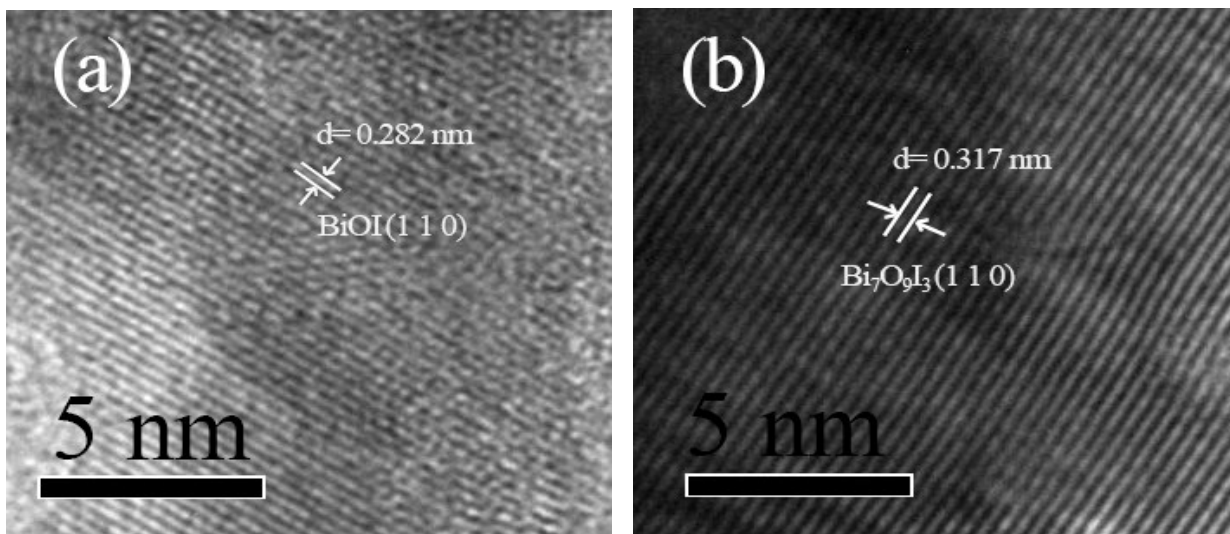

**Fig. S1.** TEM images of as-synthesized BiOI (a) and  $\text{Bi}_7\text{O}_9\text{I}_3$  (b).

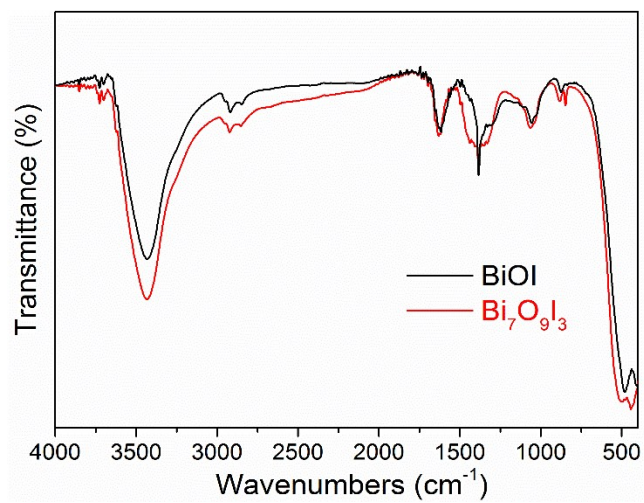

**Fig. S2.** FT-IR spectra of as-synthesized samples.

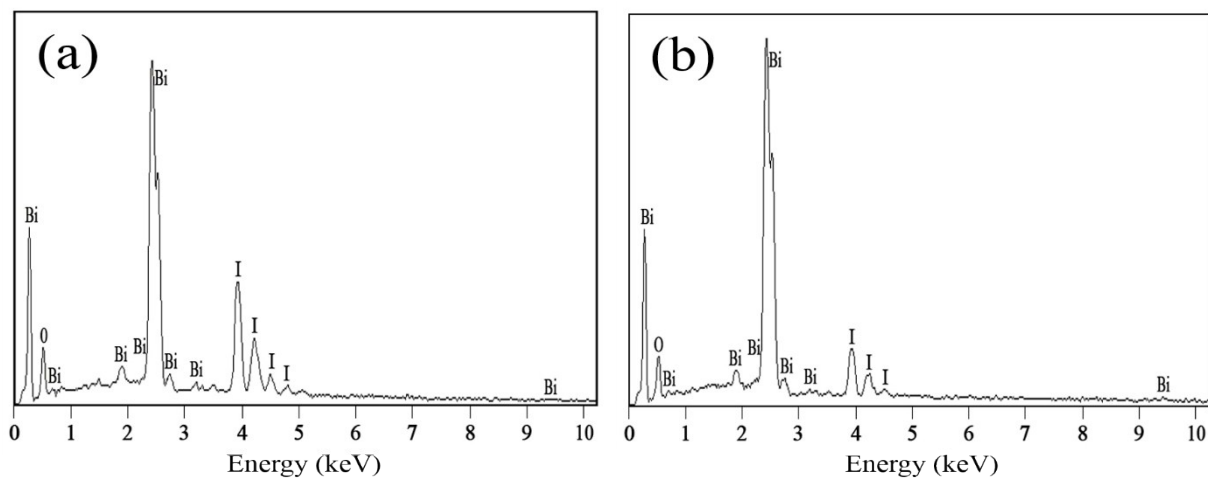

**Fig. S3.** EDS spectra of as-synthesized BiOI (a) and  $\text{Bi}_7\text{O}_9\text{I}_3$  (b).

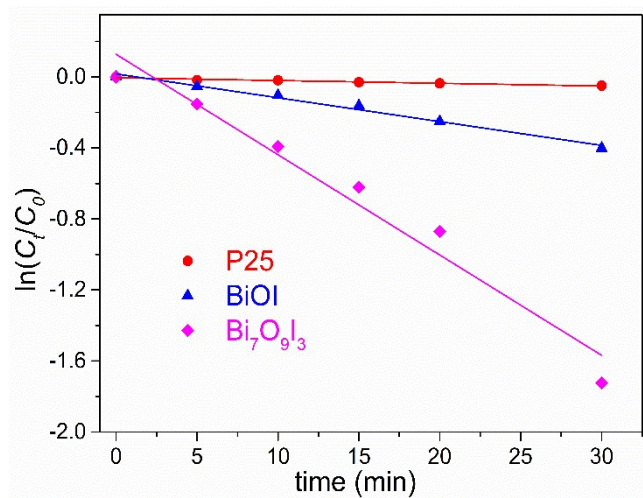

**Fig. S4.** Plots of  $\ln(C_t/C_0)$  vs. reaction time in the presence of different photocatalysts during photocatalytic degradation of BPA.

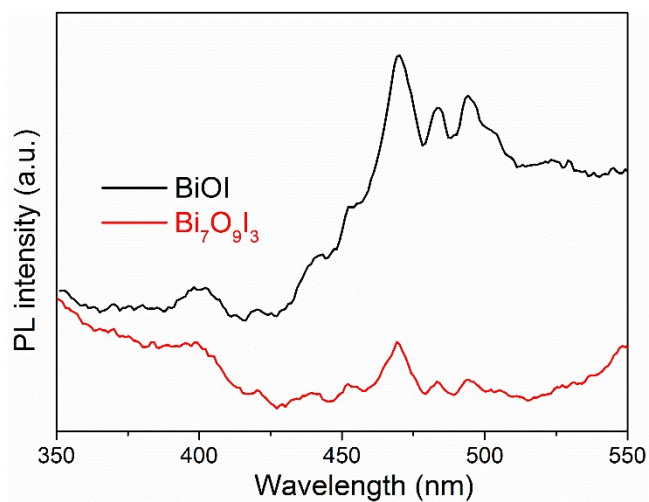

**Fig. S5.** PL spectra of as-synthesized samples.

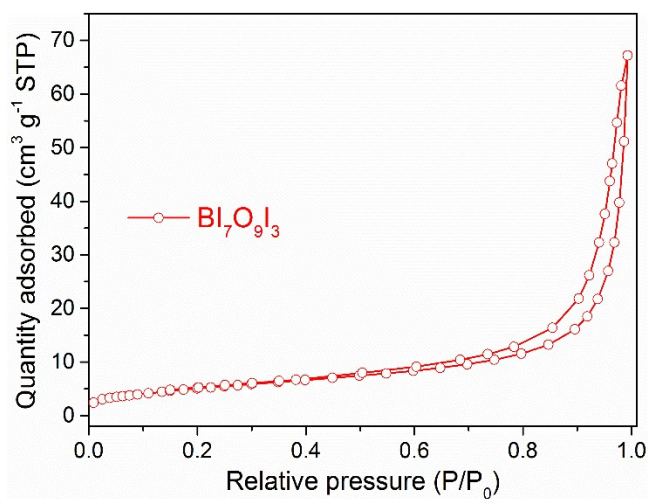

**Fig. S6.** N<sub>2</sub> adsorption-desorption isotherm distribution curve for Bi<sub>7</sub>O<sub>9</sub>I<sub>3</sub> sample.

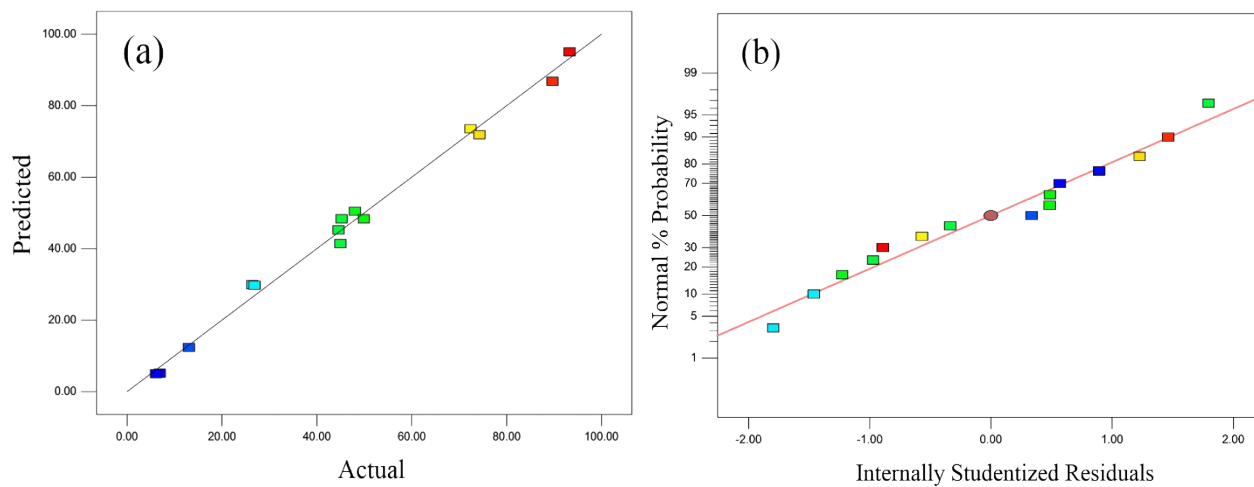

**Fig. S7.** Diagnostic plots for model adequacy, (a) plot of predicted values versus actual values, (b) plot of normal probability and internally studentized residuals.
